# Supplementary material
Source: ML conference proceedings conference paper supplement (https://proceedings.neurips.cc/paper_files/paper/2019/hash/f6e794a75c5d51de081dbefa224304f9-Abstract.html)
Supplement: Supplementary file [file f6e794a75c5d51de081dbefa224304f9-Supplemental.zip]

## A Details on local bits-back coding

Here, we show that the expected codelength of local bits-back coding agrees with Eq. (5) up to first order:

$$\mathbb{E}_{\mathbf{z}} L(\mathbf{x}, \mathbf{z}) = -\log p(\mathbf{x}) \delta_x + O(\sigma^2) \quad (13)$$

Sufficient conditions for the following argument are that the prior log density and the inverse of the flow have bounded derivatives of all orders. Let  $\mathbf{y} = f(\mathbf{x})$  and let  $\mathbf{J}$  be the Jacobian of  $f$  at  $\mathbf{x}$ . If we write  $\mathbf{z} = \mathbf{y} + \sigma \mathbf{J} \boldsymbol{\epsilon}$  for  $\boldsymbol{\epsilon} \sim \mathcal{N}(\mathbf{0}, \mathbf{I})$ , the local bits-back codelength satisfies:

$$\begin{aligned} \mathbb{E}_{\mathbf{z}} L(\mathbf{x}, \mathbf{z}) + \log \delta_x &= \mathbb{E}_{\boldsymbol{\epsilon}} L(\mathbf{x}, \mathbf{y} + \sigma \mathbf{J} \boldsymbol{\epsilon}) + \log \delta_x \\ &= \underbrace{\mathbb{E}_{\boldsymbol{\epsilon}} \log \mathcal{N}(\mathbf{y} + \sigma \mathbf{J} \boldsymbol{\epsilon}; \mathbf{y}, \sigma^2 \mathbf{J} \mathbf{J}^\top)}_{(a)} - \underbrace{\mathbb{E}_{\boldsymbol{\epsilon}} \log \mathcal{N}(\mathbf{x}; f^{-1}(\mathbf{y} + \sigma \mathbf{J} \boldsymbol{\epsilon}), \sigma^2 \mathbf{I})}_{(b)} - \underbrace{\mathbb{E}_{\boldsymbol{\epsilon}} \log p(\mathbf{y} + \sigma \mathbf{J} \boldsymbol{\epsilon})}_{(c)} \end{aligned} \quad (14)$$

We proceed by calculating each term. The first term (a) is the negative differential entropy of a Gaussian with covariance matrix  $\sigma^2 \mathbf{J} \mathbf{J}^\top$ :

$$\mathbb{E}_{\boldsymbol{\epsilon}} \log \mathcal{N}(\sigma \mathbf{J} \boldsymbol{\epsilon}; \mathbf{0}, \sigma^2 \mathbf{J} \mathbf{J}^\top) = -\frac{d}{2} \log(2\pi e \sigma^2) - \log |\det \mathbf{J}| \quad (15)$$

We calculate the second term (b) by taking a Taylor expansion of  $f^{-1}$  around  $\mathbf{y}$ . Let  $f_i^{-1}$  denote the  $i^{\text{th}}$  coordinate of  $f^{-1}$ . The inverse function theorem yields

$$f_i^{-1}(\mathbf{y} + \sigma \mathbf{J} \boldsymbol{\epsilon}) = f_i^{-1}(\mathbf{y}) + \nabla f_i^{-1}(\mathbf{y})^\top (\sigma \mathbf{J} \boldsymbol{\epsilon}) + \frac{1}{2} (\sigma \mathbf{J} \boldsymbol{\epsilon})^\top \nabla^2 f_i^{-1}(\mathbf{y}) (\sigma \mathbf{J} \boldsymbol{\epsilon}) + O(\sigma^3) \quad (16)$$

$$= x_i + \sigma \epsilon_i + \frac{\sigma^2}{2} \boldsymbol{\epsilon}^\top \mathbf{M}_i \boldsymbol{\epsilon} + O(\sigma^3) \quad (17)$$

where  $\mathbf{M}_i := \mathbf{J}^\top \nabla^2 f_i^{-1}(\mathbf{y}) \mathbf{J}$ . Write  $\mathbf{v}_{\boldsymbol{\epsilon}} := [\boldsymbol{\epsilon}^\top \mathbf{M}_1 \boldsymbol{\epsilon} \quad \dots \quad \boldsymbol{\epsilon}^\top \mathbf{M}_d \boldsymbol{\epsilon}]^\top$ , so that the previous equation can be written in vector form as  $f^{-1}(\mathbf{y} + \sigma \mathbf{J} \boldsymbol{\epsilon}) = \mathbf{x} + \sigma \boldsymbol{\epsilon} + \frac{\sigma^2}{2} \mathbf{v}_{\boldsymbol{\epsilon}} + O(\sigma^3)$ . With this in hand, term (b) reduces to:

$$-\mathbb{E}_{\boldsymbol{\epsilon}} \log \mathcal{N}(\mathbf{x}; f^{-1}(\mathbf{y} + \sigma \mathbf{J} \boldsymbol{\epsilon}), \sigma^2 \mathbf{I}) = -\mathbb{E}_{\boldsymbol{\epsilon}} \log \mathcal{N}\left(\mathbf{x}; \mathbf{x} + \sigma \boldsymbol{\epsilon} + \frac{\sigma^2}{2} \mathbf{v}_{\boldsymbol{\epsilon}} + O(\sigma^3), \sigma^2 \mathbf{I}\right) \quad (18)$$

$$= \mathbb{E}_{\boldsymbol{\epsilon}} \left[ \frac{d}{2} \log(2\pi \sigma^2) + \frac{\log e}{2\sigma^2} (\|\sigma \boldsymbol{\epsilon}\|^2 + \sigma^3 \boldsymbol{\epsilon}^\top \mathbf{v}_{\boldsymbol{\epsilon}} + O(\sigma^4)) \right] \quad (19)$$

$$= \frac{d}{2} \log(2\pi e \sigma^2) + \frac{\sigma \log e}{2} \mathbb{E}_{\boldsymbol{\epsilon}} [\boldsymbol{\epsilon}^\top \mathbf{v}_{\boldsymbol{\epsilon}}] + O(\sigma^2) \quad (20)$$

Because the coordinates of  $\boldsymbol{\epsilon}$  are independent and have zero third moment, we have

$$\mathbb{E}_{\boldsymbol{\epsilon}} [\boldsymbol{\epsilon}^\top \mathbf{v}_{\boldsymbol{\epsilon}}] = \mathbb{E}_{\boldsymbol{\epsilon}} \left[ \sum_i \epsilon_i \boldsymbol{\epsilon}^\top \mathbf{M}_i \boldsymbol{\epsilon} \right] = \mathbb{E}_{\boldsymbol{\epsilon}} \left[ \sum_{i,j,k} (\mathbf{M}_i)_{jk} \epsilon_i \epsilon_j \epsilon_k \right] = \sum_{i,j,k} (\mathbf{M}_i)_{jk} \mathbb{E}_{\boldsymbol{\epsilon}} [\epsilon_i \epsilon_j \epsilon_k] = 0 \quad (21)$$

which implies that

$$-\mathbb{E}_{\boldsymbol{\epsilon}} \log \mathcal{N}(\mathbf{x}; f^{-1}(\mathbf{y} + \sigma \mathbf{J} \boldsymbol{\epsilon}), \sigma^2 \mathbf{I}) = \frac{d}{2} \log(2\pi e \sigma^2) + O(\sigma^2) \quad (22)$$

The final term (c) is given by

$$-\mathbb{E}_{\boldsymbol{\epsilon}} \log p(\mathbf{y} + \sigma \mathbf{J} \boldsymbol{\epsilon}) = -\mathbb{E}_{\boldsymbol{\epsilon}} [\log p(\mathbf{y}) + \nabla \log p(\mathbf{y})^\top (\sigma \mathbf{J} \boldsymbol{\epsilon}) + O(\sigma^2)] \quad (23)$$

$$= -\log p(\mathbf{y}) - (\nabla \log p(\mathbf{y})^\top \sigma \mathbf{J}) \mathbb{E}_{\boldsymbol{\epsilon}} \boldsymbol{\epsilon} + O(\sigma^2) \quad (24)$$

$$= -\log p(\mathbf{y}) + O(\sigma^2) \quad (25)$$

Altogether, summing Eqs. (15), (22) and (25) yields the total codelength

$$\mathbb{E}_{\mathbf{z}} L(\mathbf{x}, \mathbf{z}) = -\log p(\mathbf{y}) - \log |\det \mathbf{J}| - \log \delta_x + O(\sigma^2) \quad (26)$$

which, to first order, does not depend on  $\sigma$ , and matches Eq. (5).

## B Full algorithms

This appendix lists the full pseudocode of our coding algorithms including decoding procedures, which we omitted from the main text for brevity.

---

### Algorithm 1 Local bits-back coding: for black box flows

---

**Require:** flow  $f$ , discretization volumes  $\delta_x, \delta_z$ , noise level  $\sigma$

```

1: procedure ENCODE( $\bar{\mathbf{x}}$ )
2:    $\mathbf{J} \leftarrow \mathbf{J}_f(\bar{\mathbf{x}})$  ▷ Compute the Jacobian of  $f$  at  $\bar{\mathbf{x}}$ 
3:   Decode  $\bar{\mathbf{z}} \sim \mathcal{N}(f(\bar{\mathbf{x}}), \sigma^2 \mathbf{J} \mathbf{J}^\top) \delta_z$  ▷ By converting to an AR model (Section 3.4.1)
4:   Encode  $\bar{\mathbf{x}}$  using  $\mathcal{N}(f^{-1}(\bar{\mathbf{z}}), \sigma^2 \mathbf{I}) \delta_x$ 
5:   Encode  $\bar{\mathbf{z}}$  using  $p(\bar{\mathbf{z}}) \delta_z$ 
6: end procedure

7: procedure DECODE()
8:   Decode  $\bar{\mathbf{z}} \sim p(\bar{\mathbf{z}}) \delta_z$ 
9:   Decode  $\bar{\mathbf{x}} \sim \mathcal{N}(f^{-1}(\bar{\mathbf{z}}), \sigma^2 \mathbf{I}) \delta_x$ 
10:   $\mathbf{J} \leftarrow \mathbf{J}_f(\bar{\mathbf{x}})$  ▷ Compute the Jacobian of  $f$  at  $\bar{\mathbf{x}}$ 
11:  Encode  $\bar{\mathbf{z}}$  using  $\mathcal{N}(f(\bar{\mathbf{x}}), \sigma^2 \mathbf{J} \mathbf{J}^\top) \delta_z$  ▷ By converting to an AR model (Section 3.4.1)
12:  return  $\bar{\mathbf{x}}$ 
13: end procedure

```

---



---

### Algorithm 2 Local bits-back coding: for autoregressive flows

---

**Require:** autoregressive flow  $f$ , discretization volumes  $\delta_x, \delta_z$ , noise level  $\sigma$

```

1: procedure ENCODE( $\bar{\mathbf{x}}$ )
2:   for  $i = d, \dots, 1$  do ▷ Iteration ordering not mandatory, but convenient for ANS
3:     Decode  $\bar{z}_i \sim \mathcal{N}(f_i(\bar{x}_i; \bar{\mathbf{x}}_{<i}), (\sigma f'_i(\bar{x}_i; \bar{\mathbf{x}}_{<i}))^2) \delta_z^{1/d}$  ▷ Neural net operations parallelizable over  $i$ 
4:     Encode  $\bar{x}_i$  using  $\mathcal{N}(f_i^{-1}(\bar{z}_i; \bar{\mathbf{x}}_{<i}), \sigma^2) \delta_x^{1/d}$ 
5:   end for
6:   Encode  $\bar{\mathbf{z}}$  using  $p(\bar{\mathbf{z}}) \delta_z$ 
7: end procedure

8: procedure DECODE()
9:   Decode  $\bar{\mathbf{z}} \sim p(\bar{\mathbf{z}}) \delta_z$ 
10:  for  $i = 1, \dots, d$  do ▷ Order should be the opposite of encoding when using ANS
11:    Decode  $\bar{x}_i \sim \mathcal{N}(f_i^{-1}(\bar{z}_i; \bar{\mathbf{x}}_{<i}), \sigma^2) \delta_x^{1/d}$ 
12:    Encode  $\bar{z}_i$  using  $\mathcal{N}(f_i(\bar{x}_i; \bar{\mathbf{x}}_{<i}), (\sigma f'_i(\bar{x}_i; \bar{\mathbf{x}}_{<i}))^2) \delta_z^{1/d}$ 
13:  end for
14:  return  $\bar{\mathbf{x}}$ 
15: end procedure

```

---

---

**Algorithm 2** Local bits-back coding: for autoregressive flows, specialized to coupling layers

---

**Require:** coupling layer  $f$ , discretization volumes  $\delta_x, \delta_z$ , noise level  $\sigma$   
 $f$  has the form  $\mathbf{z}_{\leq d/2} = \mathbf{x}_{\leq d/2}, \mathbf{z}_{> d/2} = f(\mathbf{x}_{> d/2}; \mathbf{x}_{\leq d/2})$ , where  $f(\cdot; \mathbf{x}_{\leq d/2})$  operates elementwise

```
1: procedure ENCODE( $\bar{\mathbf{x}}$ )
2:   for  $i = d, \dots, d/2 + 1$  do                                      $\triangleright$  Neural net operations parallelizable over  $i$ 
3:     Decode  $\bar{z}_i \sim \mathcal{N}(f_i(\bar{x}_i; \bar{\mathbf{x}}_{\leq d/2}), (\sigma f'_i(\bar{x}_i; \bar{\mathbf{x}}_{\leq d/2}))^2) \delta_z^{1/d}$ 
4:     Encode  $\bar{x}_i$  using  $\mathcal{N}(f_i^{-1}(\bar{z}_i; \bar{\mathbf{x}}_{\leq d/2}), \sigma^2) \delta_x^{1/d}$ 
5:   end for
6:   for  $i = d/2, \dots, 1$  do
7:      $\bar{z}_i \leftarrow \bar{x}_i$ 
8:   end for
9:   Encode  $\bar{\mathbf{z}}$  using  $p(\bar{\mathbf{z}}) \delta_z$ 
10: end procedure

11: procedure DECODE()
12:   Decode  $\bar{\mathbf{z}} \sim p(\bar{\mathbf{z}}) \delta_z$ 
13:   for  $i = 1, \dots, d/2$  do
14:      $\bar{x}_i \leftarrow \bar{z}_i$ 
15:   end for
16:   for  $i = d/2 + 1, \dots, d$  do                                      $\triangleright$  Neural net operations parallelizable over  $i$ 
17:     Decode  $\bar{x}_i \sim \mathcal{N}(f_i^{-1}(\bar{z}_i; \bar{\mathbf{x}}_{\leq d/2}), \sigma^2) \delta_x^{1/d}$ 
18:     Encode  $\bar{z}_i$  using  $\mathcal{N}(f_i(\bar{x}_i; \bar{\mathbf{x}}_{\leq d/2}), (\sigma f'_i(\bar{x}_i; \bar{\mathbf{x}}_{\leq d/2}))^2) \delta_z^{1/d}$ 
19:   end for
20:   return  $\bar{\mathbf{x}}$ 
21: end procedure
```

---

---

**Algorithm 3** Local bits-back coding with variational dequantization

---

**Require:** flow density  $p$ , dequantization flow conditional density  $q$ , discretization volume  $\delta_x$

```
1: procedure ENCODE( $\mathbf{x}^\circ$ )                                      $\triangleright \mathbf{x}^\circ$  is discrete data
2:   Decode  $\bar{\mathbf{u}} \sim q(\bar{\mathbf{u}}|\mathbf{x}^\circ) \delta_x$  via local bits-back coding
3:    $\bar{\mathbf{x}} \leftarrow \mathbf{x}^\circ + \bar{\mathbf{u}}$                                       $\triangleright$  Dequantize
4:   Encode  $\bar{\mathbf{x}}$  using  $p(\bar{\mathbf{x}}) \delta_x$  via local bits-back coding
5: end procedure

6: procedure DECODE()
7:   Decode  $\bar{\mathbf{x}} \sim p(\bar{\mathbf{x}}) \delta_x$  via local bits-back coding
8:    $\mathbf{x}^\circ \leftarrow \lfloor \bar{\mathbf{x}} \rfloor$                                       $\triangleright$  Quantize
9:    $\bar{\mathbf{u}} \leftarrow \bar{\mathbf{x}} - \mathbf{x}^\circ$ 
10:  Encode  $\bar{\mathbf{u}}$  using  $q(\bar{\mathbf{u}}|\mathbf{x}^\circ) \delta_x$  via local bits-back coding
11:  return  $\mathbf{x}^\circ$ 
12: end procedure
```

---

## C Experiment details

Figure 2 and Tables 3 to 5 show complete results for the experiments in Section 4, which examine how compression performance is affected by the precision and noise level parameters  $\delta$  and  $\sigma$ . Table 6 contains timing results for decoding.

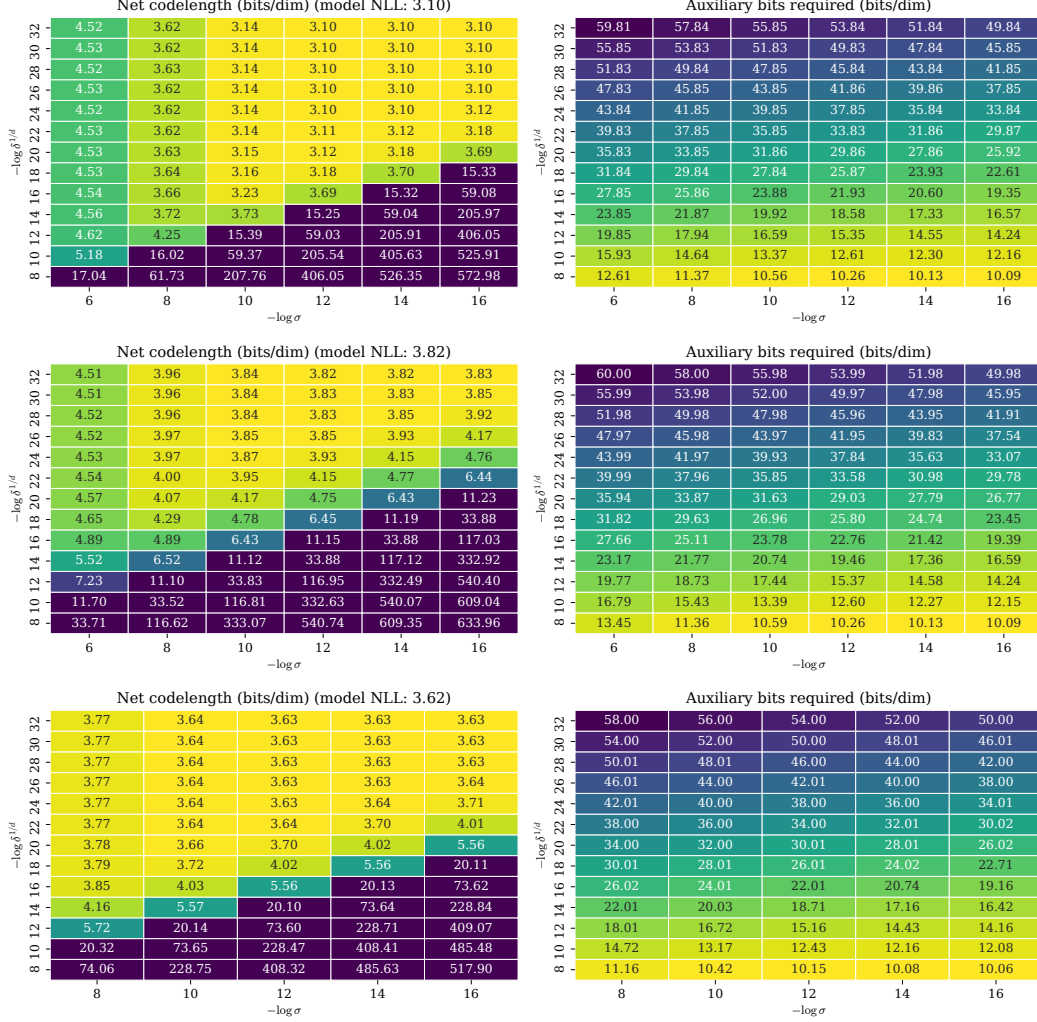

Figure 2: Codelengths on subsets of CIFAR10 (top), ImageNet 32x32 (middle), and ImageNet 64x64 (bottom)

Table 3: Codelengths on subset of CIFAR10 (bits/dim)

|                          | $\sigma = 2^{-6}$  | $\sigma = 2^{-8}$  | $\sigma = 2^{-10}$  | $\sigma = 2^{-12}$  | $\sigma = 2^{-14}$  | $\sigma = 2^{-16}$  |
|--------------------------|--------------------|--------------------|---------------------|---------------------|---------------------|---------------------|
| Net codelength           |                    |                    |                     |                     |                     |                     |
| $\delta^{1/d} = 2^{-32}$ | $4.520 \pm 0.082$  | $3.623 \pm 0.109$  | $3.141 \pm 0.138$   | $3.102 \pm 0.141$   | $3.099 \pm 0.140$   | $3.099 \pm 0.140$   |
| $\delta^{1/d} = 2^{-30}$ | $4.526 \pm 0.082$  | $3.624 \pm 0.108$  | $3.141 \pm 0.137$   | $3.103 \pm 0.141$   | $3.099 \pm 0.141$   | $3.099 \pm 0.142$   |
| $\delta^{1/d} = 2^{-28}$ | $4.519 \pm 0.081$  | $3.628 \pm 0.110$  | $3.142 \pm 0.138$   | $3.103 \pm 0.141$   | $3.099 \pm 0.144$   | $3.099 \pm 0.142$   |
| $\delta^{1/d} = 2^{-26}$ | $4.528 \pm 0.083$  | $3.624 \pm 0.107$  | $3.141 \pm 0.138$   | $3.101 \pm 0.140$   | $3.098 \pm 0.141$   | $3.104 \pm 0.143$   |
| $\delta^{1/d} = 2^{-24}$ | $4.525 \pm 0.075$  | $3.625 \pm 0.111$  | $3.139 \pm 0.134$   | $3.102 \pm 0.143$   | $3.103 \pm 0.144$   | $3.119 \pm 0.144$   |
| $\delta^{1/d} = 2^{-22}$ | $4.530 \pm 0.085$  | $3.624 \pm 0.112$  | $3.142 \pm 0.134$   | $3.107 \pm 0.140$   | $3.119 \pm 0.142$   | $3.181 \pm 0.146$   |
| $\delta^{1/d} = 2^{-20}$ | $4.528 \pm 0.081$  | $3.634 \pm 0.103$  | $3.147 \pm 0.135$   | $3.122 \pm 0.141$   | $3.178 \pm 0.137$   | $3.691 \pm 0.160$   |
| $\delta^{1/d} = 2^{-18}$ | $4.529 \pm 0.077$  | $3.639 \pm 0.103$  | $3.163 \pm 0.138$   | $3.181 \pm 0.141$   | $3.698 \pm 0.149$   | $15.333 \pm 0.387$  |
| $\delta^{1/d} = 2^{-16}$ | $4.536 \pm 0.081$  | $3.655 \pm 0.102$  | $3.228 \pm 0.143$   | $3.692 \pm 0.140$   | $15.323 \pm 0.433$  | $59.078 \pm 0.897$  |
| $\delta^{1/d} = 2^{-14}$ | $4.558 \pm 0.081$  | $3.716 \pm 0.104$  | $3.732 \pm 0.148$   | $15.252 \pm 0.448$  | $59.042 \pm 0.926$  | $205.973 \pm 2.394$ |
| $\delta^{1/d} = 2^{-12}$ | $4.622 \pm 0.078$  | $4.252 \pm 0.108$  | $15.389 \pm 0.361$  | $59.031 \pm 0.979$  | $205.908 \pm 2.238$ | $406.046 \pm 1.863$ |
| $\delta^{1/d} = 2^{-10}$ | $5.179 \pm 0.080$  | $16.015 \pm 0.347$ | $59.370 \pm 0.988$  | $205.539 \pm 2.159$ | $405.630 \pm 1.920$ | $525.914 \pm 1.951$ |
| $\delta^{1/d} = 2^{-8}$  | $17.040 \pm 0.332$ | $61.730 \pm 0.892$ | $207.756 \pm 2.065$ | $406.051 \pm 1.772$ | $526.353 \pm 1.720$ | $572.980 \pm 1.416$ |
| Auxiliary bits required  |                    |                    |                     |                     |                     |                     |
| $\delta^{1/d} = 2^{-32}$ | $59.813 \pm 0.078$ | $57.836 \pm 0.063$ | $55.847 \pm 0.072$  | $53.844 \pm 0.078$  | $51.840 \pm 0.088$  | $49.844 \pm 0.070$  |
| $\delta^{1/d} = 2^{-30}$ | $55.846 \pm 0.076$ | $53.833 \pm 0.081$ | $51.830 \pm 0.086$  | $49.829 \pm 0.094$  | $47.843 \pm 0.085$  | $45.854 \pm 0.079$  |
| $\delta^{1/d} = 2^{-28}$ | $51.833 \pm 0.079$ | $49.841 \pm 0.072$ | $47.846 \pm 0.073$  | $45.844 \pm 0.074$  | $43.844 \pm 0.082$  | $41.848 \pm 0.076$  |
| $\delta^{1/d} = 2^{-26}$ | $47.831 \pm 0.087$ | $45.847 \pm 0.082$ | $43.855 \pm 0.080$  | $41.861 \pm 0.084$  | $39.858 \pm 0.076$  | $37.846 \pm 0.078$  |
| $\delta^{1/d} = 2^{-24}$ | $43.841 \pm 0.060$ | $41.849 \pm 0.068$ | $39.853 \pm 0.080$  | $37.855 \pm 0.083$  | $35.838 \pm 0.065$  | $33.844 \pm 0.067$  |
| $\delta^{1/d} = 2^{-22}$ | $39.832 \pm 0.101$ | $37.848 \pm 0.072$ | $35.848 \pm 0.069$  | $33.834 \pm 0.068$  | $31.858 \pm 0.060$  | $29.874 \pm 0.087$  |
| $\delta^{1/d} = 2^{-20}$ | $35.834 \pm 0.064$ | $33.850 \pm 0.082$ | $31.857 \pm 0.086$  | $29.859 \pm 0.082$  | $27.861 \pm 0.093$  | $25.923 \pm 0.060$  |
| $\delta^{1/d} = 2^{-18}$ | $31.840 \pm 0.075$ | $29.845 \pm 0.081$ | $27.845 \pm 0.072$  | $25.874 \pm 0.069$  | $23.932 \pm 0.086$  | $22.608 \pm 0.108$  |
| $\delta^{1/d} = 2^{-16}$ | $27.852 \pm 0.090$ | $25.856 \pm 0.074$ | $23.875 \pm 0.084$  | $21.931 \pm 0.072$  | $20.595 \pm 0.107$  | $19.350 \pm 0.000$  |
| $\delta^{1/d} = 2^{-14}$ | $23.852 \pm 0.070$ | $21.867 \pm 0.073$ | $19.918 \pm 0.075$  | $18.578 \pm 0.108$  | $17.331 \pm 0.000$  | $16.573 \pm 0.000$  |
| $\delta^{1/d} = 2^{-12}$ | $19.853 \pm 0.073$ | $17.940 \pm 0.077$ | $16.590 \pm 0.114$  | $15.350 \pm 0.000$  | $14.549 \pm 0.000$  | $14.236 \pm 0.000$  |
| $\delta^{1/d} = 2^{-10}$ | $15.933 \pm 0.070$ | $14.638 \pm 0.102$ | $13.368 \pm 0.000$  | $12.610 \pm 0.000$  | $12.297 \pm 0.000$  | $12.156 \pm 0.000$  |
| $\delta^{1/d} = 2^{-8}$  | $12.607 \pm 0.108$ | $11.369 \pm 0.000$ | $10.562 \pm 0.000$  | $10.264 \pm 0.000$  | $10.134 \pm 0.000$  | $10.087 \pm 0.000$  |

Table 4: Codelengths on subset of ImageNet 32x32 (bits/dim)

|                          | $\sigma = 2^{-6}$  | $\sigma = 2^{-8}$   | $\sigma = 2^{-10}$  | $\sigma = 2^{-12}$  | $\sigma = 2^{-14}$  | $\sigma = 2^{-16}$  |
|--------------------------|--------------------|---------------------|---------------------|---------------------|---------------------|---------------------|
| Net codelength           |                    |                     |                     |                     |                     |                     |
| $\delta^{1/d} = 2^{-32}$ | $4.513 \pm 0.050$  | $3.961 \pm 0.070$   | $3.839 \pm 0.086$   | $3.825 \pm 0.091$   | $3.825 \pm 0.091$   | $3.831 \pm 0.091$   |
| $\delta^{1/d} = 2^{-30}$ | $4.513 \pm 0.047$  | $3.962 \pm 0.069$   | $3.839 \pm 0.086$   | $3.826 \pm 0.091$   | $3.833 \pm 0.092$   | $3.854 \pm 0.089$   |
| $\delta^{1/d} = 2^{-28}$ | $4.517 \pm 0.052$  | $3.963 \pm 0.071$   | $3.839 \pm 0.088$   | $3.833 \pm 0.092$   | $3.850 \pm 0.090$   | $3.917 \pm 0.090$   |
| $\delta^{1/d} = 2^{-26}$ | $4.522 \pm 0.049$  | $3.965 \pm 0.069$   | $3.849 \pm 0.087$   | $3.852 \pm 0.090$   | $3.925 \pm 0.090$   | $4.166 \pm 0.089$   |
| $\delta^{1/d} = 2^{-24}$ | $4.528 \pm 0.050$  | $3.973 \pm 0.072$   | $3.871 \pm 0.087$   | $3.933 \pm 0.095$   | $4.148 \pm 0.091$   | $4.763 \pm 0.101$   |
| $\delta^{1/d} = 2^{-22}$ | $4.538 \pm 0.048$  | $3.995 \pm 0.071$   | $3.947 \pm 0.089$   | $4.151 \pm 0.095$   | $4.769 \pm 0.097$   | $6.437 \pm 0.110$   |
| $\delta^{1/d} = 2^{-20}$ | $4.569 \pm 0.048$  | $4.070 \pm 0.074$   | $4.173 \pm 0.076$   | $4.752 \pm 0.087$   | $6.434 \pm 0.143$   | $11.231 \pm 0.303$  |
| $\delta^{1/d} = 2^{-18}$ | $4.653 \pm 0.044$  | $4.292 \pm 0.072$   | $4.781 \pm 0.086$   | $6.452 \pm 0.136$   | $11.194 \pm 0.305$  | $33.878 \pm 0.704$  |
| $\delta^{1/d} = 2^{-16}$ | $4.895 \pm 0.041$  | $4.889 \pm 0.054$   | $6.427 \pm 0.082$   | $11.148 \pm 0.314$  | $33.878 \pm 0.858$  | $117.029 \pm 1.249$ |
| $\delta^{1/d} = 2^{-14}$ | $5.524 \pm 0.044$  | $6.524 \pm 0.106$   | $11.119 \pm 0.359$  | $33.883 \pm 0.855$  | $117.121 \pm 1.431$ | $332.916 \pm 2.599$ |
| $\delta^{1/d} = 2^{-12}$ | $7.230 \pm 0.094$  | $11.098 \pm 0.248$  | $33.831 \pm 0.755$  | $116.947 \pm 1.200$ | $332.488 \pm 2.464$ | $540.396 \pm 2.686$ |
| $\delta^{1/d} = 2^{-10}$ | $11.700 \pm 0.317$ | $33.523 \pm 0.891$  | $116.809 \pm 1.177$ | $332.633 \pm 2.736$ | $540.065 \pm 2.580$ | $609.042 \pm 2.046$ |
| $\delta^{1/d} = 2^{-8}$  | $33.709 \pm 0.746$ | $116.615 \pm 1.286$ | $333.066 \pm 2.688$ | $540.738 \pm 2.327$ | $609.349 \pm 1.831$ | $633.963 \pm 1.950$ |
| Auxiliary bits required  |                    |                     |                     |                     |                     |                     |
| $\delta^{1/d} = 2^{-32}$ | $59.996 \pm 0.083$ | $57.996 \pm 0.066$  | $55.977 \pm 0.065$  | $53.986 \pm 0.067$  | $51.981 \pm 0.061$  | $49.975 \pm 0.057$  |
| $\delta^{1/d} = 2^{-30}$ | $55.988 \pm 0.074$ | $53.984 \pm 0.066$  | $52.000 \pm 0.062$  | $49.973 \pm 0.071$  | $47.982 \pm 0.064$  | $45.947 \pm 0.064$  |
| $\delta^{1/d} = 2^{-28}$ | $51.984 \pm 0.084$ | $49.984 \pm 0.071$  | $47.985 \pm 0.072$  | $45.963 \pm 0.066$  | $43.950 \pm 0.069$  | $41.911 \pm 0.080$  |
| $\delta^{1/d} = 2^{-26}$ | $47.971 \pm 0.079$ | $45.976 \pm 0.075$  | $43.974 \pm 0.077$  | $41.947 \pm 0.071$  | $39.827 \pm 0.033$  | $37.537 \pm 0.039$  |
| $\delta^{1/d} = 2^{-24}$ | $43.991 \pm 0.047$ | $41.969 \pm 0.072$  | $39.934 \pm 0.076$  | $37.841 \pm 0.063$  | $35.627 \pm 0.051$  | $33.068 \pm 0.071$  |
| $\delta^{1/d} = 2^{-22}$ | $39.986 \pm 0.063$ | $37.962 \pm 0.067$  | $35.850 \pm 0.052$  | $33.582 \pm 0.059$  | $30.980 \pm 0.050$  | $29.777 \pm 0.025$  |
| $\delta^{1/d} = 2^{-20}$ | $35.938 \pm 0.072$ | $33.872 \pm 0.071$  | $31.629 \pm 0.066$  | $29.028 \pm 0.060$  | $27.787 \pm 0.021$  | $26.765 \pm 0.019$  |
| $\delta^{1/d} = 2^{-18}$ | $31.816 \pm 0.045$ | $29.633 \pm 0.045$  | $26.965 \pm 0.019$  | $25.800 \pm 0.031$  | $24.736 \pm 0.024$  | $23.446 \pm 0.044$  |
| $\delta^{1/d} = 2^{-16}$ | $27.664 \pm 0.048$ | $25.111 \pm 0.050$  | $23.781 \pm 0.010$  | $22.762 \pm 0.024$  | $21.425 \pm 0.048$  | $19.386 \pm 0.000$  |
| $\delta^{1/d} = 2^{-14}$ | $23.175 \pm 0.045$ | $21.773 \pm 0.013$  | $20.742 \pm 0.012$  | $19.462 \pm 0.015$  | $17.365 \pm 0.000$  | $16.589 \pm 0.000$  |
| $\delta^{1/d} = 2^{-12}$ | $19.775 \pm 0.029$ | $18.735 \pm 0.029$  | $17.435 \pm 0.026$  | $15.366 \pm 0.000$  | $14.582 \pm 0.000$  | $14.236 \pm 0.002$  |
| $\delta^{1/d} = 2^{-10}$ | $16.788 \pm 0.023$ | $15.435 \pm 0.023$  | $13.389 \pm 0.000$  | $12.598 \pm 0.000$  | $12.271 \pm 0.003$  | $12.152 \pm 0.002$  |
| $\delta^{1/d} = 2^{-8}$  | $13.451 \pm 0.013$ | $11.362 \pm 0.000$  | $10.586 \pm 0.000$  | $10.256 \pm 0.001$  | $10.133 \pm 0.001$  | $10.087 \pm 0.001$  |

Table 5: Codelengths on subset of ImageNet 64x64 (bits/dim)

|                          | $\sigma = 2^{-8}$  | $\sigma = 2^{-10}$  | $\sigma = 2^{-12}$  | $\sigma = 2^{-14}$  | $\sigma = 2^{-16}$  |
|--------------------------|--------------------|---------------------|---------------------|---------------------|---------------------|
| Net codelength           |                    |                     |                     |                     |                     |
| $\delta^{1/d} = 2^{-32}$ | $3.771 \pm 0.062$  | $3.642 \pm 0.074$   | $3.627 \pm 0.078$   | $3.626 \pm 0.078$   | $3.626 \pm 0.078$   |
| $\delta^{1/d} = 2^{-30}$ | $3.770 \pm 0.062$  | $3.642 \pm 0.073$   | $3.627 \pm 0.078$   | $3.626 \pm 0.078$   | $3.627 \pm 0.078$   |
| $\delta^{1/d} = 2^{-28}$ | $3.772 \pm 0.062$  | $3.642 \pm 0.074$   | $3.627 \pm 0.078$   | $3.627 \pm 0.078$   | $3.628 \pm 0.078$   |
| $\delta^{1/d} = 2^{-26}$ | $3.772 \pm 0.062$  | $3.642 \pm 0.074$   | $3.628 \pm 0.078$   | $3.629 \pm 0.078$   | $3.640 \pm 0.078$   |
| $\delta^{1/d} = 2^{-24}$ | $3.772 \pm 0.061$  | $3.643 \pm 0.074$   | $3.630 \pm 0.078$   | $3.641 \pm 0.079$   | $3.705 \pm 0.079$   |
| $\delta^{1/d} = 2^{-22}$ | $3.774 \pm 0.062$  | $3.645 \pm 0.074$   | $3.641 \pm 0.077$   | $3.702 \pm 0.079$   | $4.014 \pm 0.081$   |
| $\delta^{1/d} = 2^{-20}$ | $3.776 \pm 0.063$  | $3.659 \pm 0.074$   | $3.705 \pm 0.078$   | $4.017 \pm 0.080$   | $5.563 \pm 0.096$   |
| $\delta^{1/d} = 2^{-18}$ | $3.788 \pm 0.061$  | $3.721 \pm 0.077$   | $4.017 \pm 0.082$   | $5.559 \pm 0.081$   | $20.108 \pm 0.201$  |
| $\delta^{1/d} = 2^{-16}$ | $3.852 \pm 0.063$  | $4.032 \pm 0.075$   | $5.557 \pm 0.076$   | $20.128 \pm 0.183$  | $73.619 \pm 0.724$  |
| $\delta^{1/d} = 2^{-14}$ | $4.158 \pm 0.066$  | $5.571 \pm 0.079$   | $20.100 \pm 0.187$  | $73.637 \pm 0.759$  | $228.844 \pm 0.629$ |
| $\delta^{1/d} = 2^{-12}$ | $5.721 \pm 0.067$  | $20.142 \pm 0.243$  | $73.596 \pm 0.717$  | $228.707 \pm 0.651$ | $409.066 \pm 1.126$ |
| $\delta^{1/d} = 2^{-10}$ | $20.321 \pm 0.222$ | $73.654 \pm 0.676$  | $228.471 \pm 0.703$ | $408.415 \pm 0.903$ | $485.477 \pm 1.315$ |
| $\delta^{1/d} = 2^{-8}$  | $74.060 \pm 0.837$ | $228.752 \pm 0.565$ | $408.316 \pm 0.980$ | $485.631 \pm 1.070$ | $517.896 \pm 1.127$ |
| Auxiliary bits required  |                    |                     |                     |                     |                     |
| $\delta^{1/d} = 2^{-32}$ | $58.001 \pm 0.046$ | $55.998 \pm 0.049$  | $53.999 \pm 0.042$  | $52.003 \pm 0.049$  | $50.001 \pm 0.042$  |
| $\delta^{1/d} = 2^{-30}$ | $53.997 \pm 0.046$ | $51.999 \pm 0.051$  | $50.001 \pm 0.048$  | $48.012 \pm 0.040$  | $46.012 \pm 0.045$  |
| $\delta^{1/d} = 2^{-28}$ | $50.009 \pm 0.049$ | $48.013 \pm 0.044$  | $46.003 \pm 0.049$  | $44.003 \pm 0.044$  | $42.002 \pm 0.048$  |
| $\delta^{1/d} = 2^{-26}$ | $46.005 \pm 0.046$ | $44.001 \pm 0.045$  | $42.006 \pm 0.048$  | $40.001 \pm 0.045$  | $38.002 \pm 0.040$  |
| $\delta^{1/d} = 2^{-24}$ | $42.007 \pm 0.044$ | $39.998 \pm 0.040$  | $38.003 \pm 0.045$  | $36.003 \pm 0.046$  | $34.006 \pm 0.042$  |
| $\delta^{1/d} = 2^{-22}$ | $38.004 \pm 0.040$ | $36.004 \pm 0.045$  | $34.004 \pm 0.049$  | $32.008 \pm 0.047$  | $30.019 \pm 0.039$  |
| $\delta^{1/d} = 2^{-20}$ | $33.999 \pm 0.044$ | $32.004 \pm 0.041$  | $30.008 \pm 0.046$  | $28.007 \pm 0.044$  | $26.020 \pm 0.041$  |
| $\delta^{1/d} = 2^{-18}$ | $30.010 \pm 0.037$ | $28.007 \pm 0.044$  | $26.013 \pm 0.035$  | $24.017 \pm 0.032$  | $22.715 \pm 0.041$  |
| $\delta^{1/d} = 2^{-16}$ | $26.020 \pm 0.048$ | $24.013 \pm 0.039$  | $22.010 \pm 0.031$  | $20.739 \pm 0.043$  | $19.158 \pm 0.000$  |
| $\delta^{1/d} = 2^{-14}$ | $22.013 \pm 0.038$ | $20.028 \pm 0.033$  | $18.714 \pm 0.047$  | $17.158 \pm 0.000$  | $16.419 \pm 0.000$  |
| $\delta^{1/d} = 2^{-12}$ | $18.012 \pm 0.033$ | $16.719 \pm 0.044$  | $15.165 \pm 0.000$  | $14.429 \pm 0.000$  | $14.156 \pm 0.000$  |
| $\delta^{1/d} = 2^{-10}$ | $14.722 \pm 0.046$ | $13.172 \pm 0.000$  | $12.428 \pm 0.000$  | $12.160 \pm 0.000$  | $12.084 \pm 0.000$  |
| $\delta^{1/d} = 2^{-8}$  | $11.157 \pm 0.000$ | $10.415 \pm 0.000$  | $10.153 \pm 0.000$  | $10.080 \pm 0.000$  | $10.056 \pm 0.000$  |

Table 6: Decoding time (in seconds per datapoint)

| Compression algorithm           | Batch size | CIFAR10          | ImageNet 32x32     | ImageNet 64x64     |
|---------------------------------|------------|------------------|--------------------|--------------------|
| Black box (Algorithm 1)         | 1          | $65.90 \pm 0.10$ | $564.42 \pm 15.26$ | $1351.04 \pm 3.31$ |
| Compositional (Section 3.4.3)   | 1          | $0.78 \pm 0.02$  | $0.92 \pm 0.00$    | $0.71 \pm 0.03$    |
|                                 | 64         | $0.09 \pm 0.00$  | $0.17 \pm 0.00$    | $0.18 \pm 0.00$    |
| Neural net only, without coding | 1          | $0.50 \pm 0.03$  | $0.76 \pm 0.00$    | $0.44 \pm 0.00$    |
|                                 | 64         | $0.04 \pm 0.00$  | $0.13 \pm 0.00$    | $0.05 \pm 0.00$    |
